# Supplementary material for: Perceptions of Voluntary Horizontal Confidential Food Safety Data Sharing: An Exploratory Interview Study with Food Industry Leadership
Source: Research Square preprint supplement (doi:10.21203/rs.3.rs-6960610/v2), 2025-12-05
Supplement: Supplementary file 2 [file 8889dfd47f7fc28955ebd4e6.docx]

**Supplementary Information S4.**

**List of interview quotes organized by themes and theme aspects within each theme**

1. **Data sharing can enhance food safety practices and decision-making due to access to more data points**
   1. **Data sharing would allow food safety benchmarking and better predictive modeling and risk mitigation due to the large database**
      1. *"Anonymously sharing them with other like types of either processors or growers or other folks within the industry to look at potential trends or segments of the business, that could lead to understanding of what potentially causes outbreaks. The reason we feel that this data sharing can help in those regards is because the failures as it relates to the data that we're talking about here are so infrequent an individual company might not be big enough to have enough data points to build and understand trends. And so, what the industry talks about is if we could share our data collectively in a manner that would give us more data points to look at, then we might be able to build a trend or understand what's going on from an industry perspective because all of those data points then can give you more things to look at versus in our particular case."*
      2. *"And since some of the struggles we're facing, we're probably seeing the same thing with our competitors … To share those data, to understand the struggles that everybody is facing can help to improve and to drive best practice in the same sectors."*
      3. *“I think the power of interrogating data really comes from as rich and diverse a dataset as possible, and bringing together different parts of the industry and different perspectives, as broad a supply network as possible because the more we do that, the earlier we are likely to notice any early signals and also to be able to move towards prediction and what those key triggers might be and, how do we use big data and modeling to actually create predictive models that enable us to get ahead of some of these events or notice them very much earlier than typically we do now. And I think there's also an opportunity, if we can notice things earlier, we can, as an industry act more quickly.”*
      4. *"I think it will be very beneficial, especially for small companies, because the big companies can spend all the money they want in researching or finding whether it works, but the small companies don't have those resources and sometimes they struggle to find what is best because they don't have that experience."*
      5. *“So the more data points of the failures, because we all know that we have lots of data points to say our product is meeting our requirements, but it's more of the data points when we have these failures, the more we can share as an industry, the more we can start to piece of puzzle together what and why these sort of reoccurring outbreaks are occurring, and try to figure out then mitigation steps to minimize those from reoccurring.”*
      6. *"And that can be a very powerful thing in terms of how we start to address some of the longer term not answered yet, food safety problems, just in terms of, like you know how do you better define risk? What are the best practices? Are we testing enough? And is this process in control as we've kind of conceptualized it, within our food safety program? I think looking at the aggregated best practices in HTST production and seeing who's doing what and what their risk profile looks like, which might be defined in a quantitative microbial risk assessment at some level, I think there's a path there."*
      7. *"As companies digitalize, we get richer data that has better tagging, better structures, and more meaningful components to it. And I think that's also an element of data sharing where, as we deploy more of these technologies, you won't get complete data sharing on everything, but we'll learn because I still believe a lot of people see food safety as precompetitive, what elements to share to make industries and commodities safer as a whole."*
      8. *"I'm sure there would be benefits if a competitor of ours was having success in one area that we were struggling with. I'm sure there's something there, but without having more information or kind of guidelines around that, it's hard to say exactly if we would be able to use that to our advantage. "*
      9. *"I think if we were able to resolve concerns regarding confidentiality and data use, industry would much more quickly be able to identify source of outbreaks. Particularly as wider use of whole genome sequence data, particularly regarding microbiological contamination, is identified. I think in terms of other types of contaminants, there is value that can be leveraged from larger datasets that may be able to be obtained from a larger industry in terms of trends regarding contaminants, heavy metals, other types of contaminants that may be of concern, which would allow companies to manage their risk profiles a bit more efficiently by understanding larger data sets associated with contaminants."*
      10. *"I also think that depending upon what the data is, if we had access to a bigger volume of data, there’s more potential to learn from that data for food safety improvements. If we think about some of the technologies around predictive analytics, for example, within a single organization you often don't have enough data that's been created to take through some of those models to learn from it, if you were able to leverage data across multiple organizations to do that, we may be able to then use data to be more predictive to make food safety improvements."*
      11. *"I think of industry peers sharing their data in order to generate insights that are more powerful because the data is more diverse, and we obtain larger datasets than any one company could do on their own. We would have more powerful datasets to look at trends and insights, findings over time, and to generate perhaps common findings as well that are not necessarily specific to any one company, so that we could generate those insights together and then perhaps even collaborate together to drive change within the industry."*
      12. *"If we get more and more people willing to share their data, the end goal would be that we find either a condition, hopefully it's not a region because if it's a region that gets more complicated, but hopefully certain conditions that sort of point out risks that are higher than other risks. And then when that occurs, we are generally better at putting steps in place to minimize those risks."*
      13. *"I think there's a great benefit for industry sharing their data among each other and with the regulatory agencies as well, in large part because it sometimes can form the baseline for improving practices going forward in food safety."*
      14. *"If, as an industry, everybody was trying to establish a baseline of what a minimum norm is, that might be a situation. So, you can't come in and say, “Oh my God, we found ten coliforms per gram in your product.” If there was an industry wide database that said the norm is 100,000, then nobody can beat you up for having ten. That would be a benefit."*
      15. *"One of the primary benefits is to elevate the level of the food testing information and the status quo. If you want to improve, as you know, things always improve when we share information. So, there is benefits to sharing the information. But, you know, as you are aware, some of this information is very proprietary and companies really hold on to those information. And it's almost a privacy concern if you're sharing the food safety data."*
      16. *"The inherent benefit of sharing that information was the development of very strong industry leading best practices around food safety and food safety programs."*
      17. *"I think from a liability standpoint, there is a lot less hesitation to share information or that it really isn't in the forefront of the decision-making at the liability side, at least maybe the lawyers would answer differently if there's a lawyer. From a from a food safety lens, we're not afraid to share information with each other in that pre-competitive world because we're not concerned about the liability, because we know we're going to take it as a benchmark, but not to be used verbatim within our own food safety program."*
      18. *"When it's industry to industry data sharing, the benefits absolutely are being able to drive continuous improvement. What's unique about the produce industry compared to other industries is that we are much less focused on produce brands ... When an outbreak in that commodity happens, people avoid all of that product. They don't just avoid tomatoes from one company or avocados from one company. They just avoid all tomatoes and, in that sense, there is very much the idea that when a food safety incident occurs, it's in the entire industry's best interest to understand what happened and to be able to kind of collectively raise that bar of food safety. That's really the biggest advantage and benefit to sharing data or sharing outcomes is to be able to, like I said, just drive continuous improvement across an entire commodity."*
      19. *"… learning what others are doing as best practices, sharing also your weaknesses are areas of development, I think, help you develop confidence in your programs or identify what you need to work on."*
2. **Technical barriers, such as limited digitalization, standardization of data collection and management practices, limit the feasibility of data sharing**
   1. **Participants reported the state of digitalization in the industry as slow-moving with a heavy reliance on paper for food safety data collection**
      1. *"I guess I'll speak again to my company, we are further behind than I would prefer. We have active projects working to digitalize things. However, we still rely a lot on manual and paper documentation or systems where there's several layers where you have a piece of paper, but it's in a system and then perhaps there's a software that can help actually do something with the data. I would say we're still I would call us, you know, evolving in that space of digitalization."*
      2. *"The big trend would be larger companies that can buy software programs generally will have digital, the midsize will overwhelmingly have digital, the smaller ones will use more like an Excel sheet or a Google sheet, and then the very smallest, they may use those sheets, but they also may just write things down. It really is tied to the size of the company and how much profit, I guess, they make."*
      3. *"I'll answer it this way. I think that it can be digitalized, but I think in general, industry does not digitalize, and I think we're still working in our old ways of working, and we're still managing via Excel spreadsheets, I hate to say that, but we still are. And the lab reports, we’re still managing that way. That doesn't mean we have to. But right now, there's such a resistance to openly sharing data that there's no excitement or line of sight to digitalizing."*
      4. *“We do have initiatives on digitizing and then the digitalization. I kind of segregate it as we are still a very paper heavy organization. Most of our processing facilities use a lab notebook, written down data, but then it's digitalized in many cases into a platform.”*
      5. *"It depends. It just depends. But a lot of it is either that it may not be collected digitally, but it is transferred into digital format, and then potentially shared that way."*
      6. *"If you were to segment the market into small, medium, and large producers, more sophisticated organized organizations are typically digitalized. How it's organized and deployed is probably another concept. We are seeing less and less, three-ring binders of environmental monitoring data that exists to try and manage versus it's in some type of digital record. And now we've got to think about how you transform that into a platform where it's in a, you know, kind of a workflow environment."*
      7. *"It's either handwritten or a form filled out sent back to them."*
      8. *"Well, it's hard to speak for everyone, but by and large, there's a movement towards digitizing it. However, the caveat for that, I would say, is a lot of the traditional paper records are often captured as electronic paper, PDF type files. And so, in my opinion, I don't necessarily consider that digitizing."*
      9. *"It typically is digitalized data. Various companies are in various status of their digital programs. That seems to be the current buzzword, as well as sort of the vision moving forward about how to digitalize your data and share it outward... I think the ability to convert these reams and reams of numbers into more visually informative methods has definitely helped drive the industry towards digitalization of their data."*
      10. *"One of the things I love to do is when I go into our facilities, I pop into the lab where they run all the testing and things, and inevitably it's getting better. But inevitably, five out of ten labs I visit will have a printer on the counter somewhere in the laboratory, and I'll say, "What's that thing?" Knowing it's a printer and they go to the printer and I'm like, "what's the printer for?" "Oh, we print out our results there." I'm like, "Oh, we're printing out our results. Then where do they go?” "*
      11. *"Typically, they are digitalized… There are scenarios where historically we’ve captured certain information maybe on a plant floor, in a paper format that's primarily moving towards being digitized and could be information that is part of that data collection and reporting as well."*
      12. *"So typically, I would say, yes, it is digitized, but I also know that there are some participants that have had sort of I'll call it scanned, it's a physical report that was scanned into a document… My understanding is that our data that we submitted is digitalized and then the majority of the others are as well. But if you had hard copy data that there was a way to also extract that. But it took a little bit of effort to hold the data out of that."*
      13. *"I would say it depends. I think the trend is that it's moving more towards being digitized. I'm also going to say there's a simple, simple answer is yes. I think as we progress, more and more of it will be digitized, where there's still a portion of it that sits on a piece of paper and somebody's in a drawer and a file cabinet in some somewhere. But we are moving more towards that data being digitized."*
      14. *"All the data that that is going to be collected is going to be digital. So, if by digitalized, you mean in a spreadsheet that that that can be shared? Yes, it is."*
      15. *"And I would say it's becoming more digitalized now because people see that what you can do with data."*
      16. *"Ahh, you know, this is a journey that I think not only my company, but also other companies in the industry has been working on. And I think the COVID pandemic really helps to transform and speed up that process to get everything digitalized. But I can say, I think internally we still have some paper-based documentations going on. From a corporate perspective, we would like to see more information that's secure but also can be digitally transferred so we can know process as well as our food safety hurdles and measurements in a real time fashion."*
      17. *"Sometimes it is, sometimes it's not. So, it depends on how compatible the information is with your ERP system such as SAP. So, if there is provision for directly transferring that information into SAP, it becomes digital. But if it's on paper, it remains on paper or it gets transferred to the Excel sheet. Sometimes it may get transferred to SAP depending on the importance of that information."*
      18. *"Yes. Digitalized in the meaning that it's information that we have. It could be well, in this particular case, it would have been test results, test results that that would have been collected placed into, for example, Microsoft Excel. And then, that information is shared via email or through another secure channel.“*
      19. *"There are other types of data that might be traceability records or even like wash water monitoring records. Those, I think, are more likely, especially for the small companies may still be done on paper. I think the biggest difference there's probably a strong correlation just with the size of the company. If it's a larger company, it's more likely that they're going to have digitized data."*
   2. **Data collection practices across the industry need to be standardized to enable meaningful data sharing**
      1. *"I don't think the promise is so much around the technology advances as it is around data practices. We’ve, in our organization, had many debates and conversations that the technology part is easy, it's the getting the data into the state it needs to be, is the heavy lifting and what takes resources and funding to do so. I think it's really more about setting the standards and the ability to meet those standards, especially in places where you have legacy systems in place."*
      2. *"A good example that I commonly use in the conversation is that the way we capture what an ingredient or what a product or material is called within our organization is not the same way that someone outside of our organization would capture that same ingredient, product or material. How do you know that those two things are the same thing? Or how does someone on the other side who's receiving that data in the exchange, how do they interpret that information? Or at what level you're providing that data?"*
      3. *“I think we even have a challenge within our business around how we standardize data, let alone between different businesses, units, decimal places. I think it's a minefield. And I think if we are going to be sharing data, we have got to figure out a clearer nomenclature around some of these things that does probably involve some element of standardization and a few key things. Or are we going to always be cleaning up data?”*
      4. *"Generally, people that do test and do get positives, do the right actions, but sharing that information becomes problematic because if there's, one entity who never finds a positive, does that mean that they're good or that they're not looking in the right manner? And one who finds a bunch of positives, are they a bad entity or are they doing the right thing and they're testing in the right manner and they're actually then thus keeping out the right amount of product from commerce."*
      5. *"Most firms have data, but they're not doing anything with it. When you sit down at a table with folks that are doing a lot with their data, they have a lot of information and sort of like deer in the headlights you get from the people that aren't doing anything and because they don't know you don't know what they don't know or they don't want to know. That, I think, is a challenge ... And that's where I think the challenge is, people don't know necessarily what to do with their data. They're collecting it there, their data is telling them that everything is fine, and so they're not interested in digging deeper, or you have those that are doing it on a as needed basis, but not necessarily doing anything after that. And so that's the challenge, I think, there's this spectrum of curiosity, if you will, ranging from no curiosity and complacency to intense curiosity and constantly challenging. And that spectrum, I think, is and I see it across the food industry."*
      6. *"Well, one would think that, in our world, consistent outbreaks overtime, coming from similar regions, whether it's Cyclospora or E. coli O157:H7 or Listeria, events related to fresh produce, would be an incentive. And I think for some firms that has been, but by and large or writ large of the industry, I don't think that has necessarily spurred folks on. I think there's a sense of, oh, you know that company, company X got caught up in this again, whew, it wasn't me. As opposed to saying that could happen to anybody. We're dealing with the same regions and suppliers, etc... And so, for some reason, that has not been enough incentive."*
      7. *"What I would say is before you can begin to have the sharing conversation, you have to have the identifying what sources of data are valuable to you because like number one, what problem are you trying to solve? Number two, what sources of data are valuable to you? Where do they sit in your organization? Who's responsible? How are they generated? Number three, digitalize them. Number four, once you digitalize them, you're going to have data sets and those data sets are going to grow like crazy every day. How are they structured? What's the quality of the data? And then begin to have a conversation with a partner in your value chain to say, can we structure and qualityze our data the same way, so that we're not doing, we're actually, we're actually connecting these so that the IT team can move in or a third party maybe can move in and build a solution for us around this thing."*
      8. *"I think it takes a governing body to be able to do that, to come up with the industry standards. And to define what are those minimum requirements that an organization would need to have in place, including data standards or business rules around the nomenclature that's used in that data exchange, so that we are capturing it the same way and we can consume and interpret it in the same way."*
      9. *"... because every company is different, every location is different. So, what might work for me in the company I'm in [region X] might not work for the same type of company [region Y]. So, having the information is very good, but how do you interpret [it]? How do [you] adjust that to [your] own reality?"*
      10. *"We know that there are companies that don't have very good practices and still they have to send their samples because it's regulatory required. But if they get positives, there are companies that don't release the results to the public. If they start sharing, they might have to be transparent, which is a good thing, but if they don't have good practices, they might try to hide those."*
      11. *"Our hope is that the technology is helpful, but challenges can be that if you don't put in standardized data points and or the methods in which you collect the data are different, thus meaning the data results are different. So, let's say you have a different sampling plan or a different sampling method in order to get data points that are different then folks argue that those data points then are not apples to apples ... And technology wouldn't necessarily be able to discern itself from that, but I would argue, let's look at the data. Let it come to some conclusions, and then let's sort through those conclusions first. But anyways, folks are sort of concerned, worried about challenges from technology giving us wrong information because the data wasn't collected correctly."*
      12. *"There's more of a concern that the methodologies that are different, just quickly, an example like if somebody tests more granular than somebody else. And what I mean by that is if somebody takes 100-gram sample from a 40-acre block, and then another person takes 1000-gram sample from every acre within that block... So, the person who's putting more time and effort into the more granular is losing sort of that competitive advantage because the test results in the end, look are both negative. The same negative, but one person did hardly any effort basically into getting that sample where the other one is very granular, detailed and the test results If you looked into it, one would be more reliable or more significant than the other one."*
      13. *"I would venture to say, and actually here the majority of folks within the industry, no doubt just say, "yes, we have to do data sharing." But then there's all sorts of how the data is collected and how are we going to store the data and who's going to who's going to interpret the data and the million questions that come with it. "*
      14. *"…Everybody says "I wish I knew, boy am I good or am I bad?" Well, they know because they talk to each other and they know because I used to be at this company and before that I was at this company, and by the way, guys, 40% positives, that's really bad. We have a problem or we're not finding any, and I've heard this anecdotally from people who buy a company. And then they acquire the new company, and they look at the environmental monitoring program, and there's absolutely no positives in the entire environmental monitoring program. So, this is a bad program. So, they're like, “Really? You haven't had a positive hit in three years in this facility? I don't believe you.” So now that's a useful piece of data.”*
      15. *“Everybody takes data in a different way. People use different methodologies. How do you solve this consistency of data as well as somebody to enter the data."*
      16. *"So, digitalization is extremely important for sure. But I think really a lot of companies are working on trying to, I wouldn't say not start afresh, but they're trying to go back, clean up their data, almost set rules of how you enter your data."*
      17. *"I think that each company are sometimes doing things differently and using different systems to collect the data. And some of those are discussed in certain industry forums and meetings. So, it's always interesting to see how everybody else is doing, just to have that thought and consideration of best provider and value to my company and I think it's you have to have justified reasons and to understand and ensure that the data that presented makes sense to your process and to your categories."*
      18. *"With regards to technology, I think it's the standardization of data that is most needed, and I guess standardized methods of sharing that data because there's a lot of different third-party labs that you can go to, and they may be testing or using different testing methodologies than other labs. And so then, when it comes to data sharing, if it's not standardized. People may try to make conclusions that may not be valid because the data itself does not standardized."*
      19. *"One thing I would just say as caution, though, that, it’s important that the data that is going into any technology be accurate. So that it's consistent and standardized amongst all the people that are inputting, responsible for inputting the information, technology is only as good as the accuracy of the information going in."*
3. **Trust, or lack thereof, is a key factor influencing data sharing decisions, often underlying specific concerns such as confidentiality, liability risks, and data misuse**
   1. **People are apprehensive about losing control over their data once it has been shared, fearing potential misuse, unauthorized access, or breaches of confidentiality**
      1. *" But it's going to take another issue which is not scientific, which is not data, which is trust.”*
      2. *“Once I give that data away, unless I'm absolutely confident that it's protected, it can be used as a weapon against me. So as long as I don't give it away, they may have a gun, but I haven't put the bullets in it, too.”*
      3. *"Well, the first thing that comes to mind of why we wouldn't share is just so that I guess if any data was out of the specification or the normal range, what kind of impact would that have on our sales, on our reputation, on the ability to grow? And often times any data or information can be misinterpreted or taken out of context where even though a corrective action was in place and worked correctly, if all the information isn’t shared, then the appearance of what the data may be representing could be wrong and detrimental to a company.”*
      4. *"The biggest concern would be from data that was shared and then is misinterpreted or misused, and or is used to for litigious purposes, whether the company gets sued later and or there's a regulatory action because the data is the data may be misinterpreted or used to trace back after the fact to an issue that occurred."*
      5. *"Lawyers! Lawyers and regulators. And it really it goes back to data being misused to make regulatory and legal decisions, and people who are not trained to interpret the data being the ones who are making those decisions." Participant 4*
      6. *"It gets to how is, how, if that data is public, then how is it used? If it's used for nefarious reasons, like calling into question whether another company's product is safe or whether, whether you should buy or not buy. And with today's social media, everybody thinks they're a medical doctor and environmental scientist and everything else, and they know better than anybody else. It's very, I just, I don't see that being of benefit to anybody."*
      7. *"And also, it is blinded. If I were the farmer or I was in that produce industry, yes, that would be a hesitation of if I do find a pathogen from my farm, what does that mean to me? Do I need to subject my crop to special extra controls, or can I not just sell it simply as is? And so I think those types of questions of if we get a positive, how do we handle a situation is probably one of the biggest drivers for hesitation and data sharing as well as there's a lot of smart people out there. So, if you have metadata, is somebody smart enough to figure out based on what, when information is shared, like, oh, I can pinpoint who's who the blinded contributor is. And I think that is always, from a legal standpoint, a hesitation of all the controls in place for data privacy."*
      8. *"I think with industry and when we consider sharing data, our first question tends to be, well how is this data going to be used? And who is going to be using it? And trying to lay out those guardrails ahead of the data being shared. Because once the data is out there, it sort of can be out there. And could it actually be, could somebody else take a different look at it and get a, get a hold of the data set and look at a different way that that was never intended to be the point of what was being collected. The fear being the analysis could just be incorrect, or it could be missing the context where the data was, how the data was generated. So, trying to pool those additional learnings or trend analysis outside of a data set that may have not been originally intended that way could create undue burden and issues with those who provide the data. So, sort of building that trust is really where one of the hurdles of getting to the point of sharing data is there. "*
      9. *"The misuse or misappropriation of that data would be a concern as well."*
      10. *"So companies probably would hold back on really sensitive data based on fear of litigation by being either rightly or wrongly implicated in something that they didn't have any real risk. When you get to the point of trying to do epidemiological work to assess and say, hey, this product caused this problem, I think that's where you get the reticence to just openly share everything."*
      11. *"And from what I've seen doing this and trying to apply it is again the trust that you will not be identified. I think that is the biggest hurdle to get over. We could do it [data sharing] technologically now, but the problem is the human reaction, and the trust has to happen. We always have to remember there's a human factor to making these decisions. And it becomes emotional at times, not necessarily rational either, or logical, but the human component to making decisions about this has to be considered, because the technology exists to do everything that you want to do right now, and to have it blinded or everything else. But I think we have to think about what's the human reaction that keeps us from taking that step, especially when we know that, like I said, most people want to protect public health."*
      12. *"If there could be a way that it would not jeopardize the legal position of companies going forward, I think it would be great. And NCBI does sort of this, they've got these sequences here and they track these, but having a global database of sequences that have been important in food safety, I think would be, very valuable and could be mined in a way that it hasn't been so far. But we're going to have to get over this liability fear before that's going to happen."*
      13. *"My biggest concern is what people are doing with the data. And so, I don't think in general, sharing is the problem, but I wouldn’t want people to use the data in a manner that is going to support a hidden agenda."*
      14. *"To me, as long as this is food safety data, it shouldn't be a problem because bacteria are bacteria. Now, if you start talking about quality, for instance, that would be a different story… As long as we can guarantee that the data is used the proper way and is going to be used by the right hands and not against the people that collect the data."*
      15. *"And then the big one is data security. Having it be anonymous, depending what the use of it is and then ensuring that it's not going to be used against you. So, even the fact that you put your data into a public system and then keep it hidden would be used against you. You know what I mean? And they would say, how come you won't publish your data? It's like you're willing to share it. How come you're not publishing it? It's better just to say it for legal reasons, it’s cleaner for them to draw a very solid line."*
      16. *"… you don't want to share data that might implicate you from a litigation perspective. So, the nature of the data that's shared, there has to be some legal constraints around it as well."*
      17. *"I think the main concern is privacy. For example, if company A has a lot of zone one positives, and if you give that information and share it with company B, how do you know that this information doesn't become public? So, that's the main concern. Privacy is the biggest concern."*
      18. *"The only challenge I can think of today is cybersecurity, where a bad actor goes in and gets the data and then uses it in malicious ways … What I think is the biggest risk a data breach and cybersecurity and have a bad actor come in and take the data and misuse it."*
      19. *"I'm not an IT person, but I have to say, my credit card information, my social security information, all that information is out there. And there's security oversight that it can be used but not stolen. I think we have to be open and figure out a way to say, how can we share data without it being stolen by each other or misused?"*
      20. *"The most challenging is business to business because of some confidential information. So, you may never have all the details. You may just have a here's that, micro results for pathogens or generic E coli or pH, water activity, pick a parameter. But it would be very limited. And part of that is just a concern over confidentiality, which in some cases is valid. In other cases, it is not. And it is a hurdle that will need to be overcome at some point."*
   2. **There are concerns relating to shared data being used by some participating organizations to advance their business, gain competitive advantage at the expense of others, or compromise their own company's competitive advantage**
      1. *"For that kind of data sharing to happen, the first one is to have legal involved, unfortunately or fortunately, because there's probably aspects that I'm not aware of. What are the implications of company X sharing their food safety data with company Y? Well, this could happen, this could happen; we could unintentionally try to sabotage each other. I know that's an awful thing to say, but it's very competitive. So, if Company X says, oh, you got Listeria hits, okay. So, how do we protect each other from using that information against each other to have a competitive edge in a very competitive landscape?"*
      2. *"I think, concerns around how the insights might be used to benefit some of the players more than others. You know, if you submit your data and then somebody takes the data and creates a proprietary tool that they own, that you haven't got a stake in, I think that would be, yeah. So, I think there might be a lack of trust about what happens to the insights, who owns the insights? I think the legal framework could be very tricky. And it has to be really clear that either everyone has or no one has the right to create intellectual property from the data."*
      3. *"...Especially if someone has a patented process or has figured out a way to do something that not everybody else is doing, then yeah, there could potentially be some concerns around that [privacy and confidentiality].”*
      4. *"There would need to be some legal documentation approved by all parties involved that would limit, how far that data can be used or communicated with outside of the key stakeholders."*
      5. *"...if we're talking about within the industry type of data sharing, then you're really looking for how do you ensure that you're not compromising that competitive advantage across your organizations and what you're sharing?"*
      6. *"And so is there a way to either mask or understand, what are those problems that we're trying to solve or what are those use cases in which we need to share the data to get to those minimum data elements that are really going to help us to improve food safety within the industry versus sharing some of that information that gets more towards if I knew this about your company, then I could leverage that for how I do things within my organization too..."*
      7. *"Concerns around how the insights might be used to benefit some of the players more than others. If you submit your data and then somebody takes the data and creates a proprietary tool that they own, that you haven't got a stake in. So, I think there might be a lack of trust about what happens to the insights, who owns the insights? I think the legal framework could be very tricky. And it has to be really clear that either everyone or no one has the right to create intellectual property from the data."*
      8. *"I'm sure you've heard this too, there is a sort of a saying in the food safety world, which is that food safety is not a competitive issue, but in fact, it has been with some companies where they were not willing to share some new technology or some new process for food safety because they thought it gave them a competitive advantage to have that. That, in some cases, is unfortunate, and if there were a way to do this without divulging proprietary information that led them to this practice, that would be good."*
      9. *"...but what it [data sharing] could do is it could lead their competitors into seeing what they're doing in their R&D. So, I think even though it may not be directly usable by competitors, the information is pointing to a different direction that perhaps the donor does not want others to see the survey data. For instance, how many Listeria are there in the plant, in a plant, we won't even say that it's there. So, even to hide that or blind that, but what they might do is, the competitors may be able to see company B might be able to see what company A has done and how they got that data. And that gives them a hint on what the company is doing. That's sort of private."*
      10. *"I see the benefit to data sharing. But what underpins it all is an understanding of trust between the organizations... There are companies that do share with each other, but it is not as open because I think there's a fear of if I give all my information, it's usually not the food safety individuals or quality. It usually comes from a legal or a higher leadership standpoint that says there's proprietary information here. They are technically competitors; we shouldn't share more than we need to with industry."*
      11. *"I think everybody is a little hesitant initially to share anything outside of their own four walls for a number of reasons especially the precompetitive data and that is the important differentiation between not crossing the line of antitrust, situations where information is shared about customers or pricing or markets and agreeing on certain prices for certain markets or not challenging customers. None of that occurs. Nothing like that occurs. What does occur is information that has typically been cleared, at least within our organization. It's gone through a legal review to make sure that there's nothing there that could be perceived as an antitrust."*
      12. *"And much data that's produced today is done with an intent to improve the process and be analyzed and be acted on. And that type of information and those actions are typically kept in-house. Those practices are not well shared, again, for a number of reasons, a lot of which is, it can be perceived as being a competitive advantage. It can be perceived as you probably shouldn't be sharing this because it could be an antitrust concern. And those are some of the major reasons why information, or how information is analyzed, wouldn't be shared."*
      13. *"The people don't want to overshare so that they kind of have a leading edge."*
   3. **Companies are protective of their data because of concerns that the shared data will be used against them by regulatory bodies or customers**
      1. *"…when you speak to people [in the] industry they say, well, I'd rather not share in case I'm implicated, you know, despite the fact that they have good processes and everything in place and they have their corrective actives, and corrections and they have a good food safety management system in place, you could get a misinterpretations of the data"*
      2. *" I've had a couple of experiences where when you offer up those voluntary information and next thing you know, sure enough, you get a phone call inquiring about it. It's not a positive phone call when inquiring about what's going on. And you know the old adage, we're here to help, but that's not always the case because there's a financial penalty if items are found. So, a company is opening themselves up for scrutiny. And while that might not be the cause of an issue while they're looking they find something else they don't like. And I've seen that happen several times and I think there should be some guardrails or guidelines around that as well. And again, it gets back to trust."*
      3. *"Other aspects of the industry, especially the purchasing area of an industry, if they learn about a risky area or specific subsection of a region, they can quickly say, “I don’t want anything from that area and that becomes problematic, right? So of course, people want to protect their own data because they would rather fix something versus being eliminated from a marketplace, let's say. So that becomes an area of concern. Why would I share my data if you're just going to use it against me?"*
      4. *"It really depends on getting emails constantly about different recall, but until it makes the news, that, that information, unless you seek it, you're not going to see it. And I would offer it's because of the punitive nature of exposing a company, because, quite frankly it's bad news. So, it's a lot of times you don't really hear the learnings or the assignable cause of an incident in the industry. I think that's lacking, especially in the food industry."*
      5. *"Then also there's a lot of criticizing that takes place. What's the caliber of the of the organization, number one; number two of the individuals that are sharing this information. Mistakes are made not only in the incident, but also in the testing and the data sharing. So, what's going to be the, not policing, but the quality control of the information that is provided? And what does that look like? That would be my concern."*
      6. *"I think regardless of what's in place, I think that you will have companies, customers or companies in the CPG world that will choose not to participate because of corruption of data, because of the liability that presents itself. It's always a risk-reward. Do we share and take that risk of being exposed negatively? Or do we trust that clearinghouse to then process that information and then consolidate and then triangulate with others and then share interesting data that everybody could learn from? So, it really comes down to trust."*
      7. *"We haven’t defined statute of limitations in terms of data yet, and I think that's probably one of the bigger ones that comes to mind."*
      8. *“…From a management standpoint, I think there needs to be some level of agreement or confidentiality to a point where an outside partner to who is supplying the data cannot use that against them for any kind of legal purposes or to get them in trouble if it's strictly data sharing to help improvement, that's one thing. But to use that to hurt the supplier of the data, I don't think that would be fair."*
      9. *"From the regulatory side, they can't tell you what the right thing to do is, they're only going to tell you what's wrong, and their best measurement of that is, if you have an outbreak associated with you or a product positive in the marketplace, something went wrong. And so, the challenge with regulatory is, again, they can't necessarily look at the data and say what was done right, and typically, what happens is the data is telling them what was wrong. And unfortunately, when you look at the environmental assessments they conduct throughout the investigation and after the investigation gets summarized, it's not a lot of information…"*
      10. *" From a food safety perspective is yes, we'd like to know all the pathogens out there, and have controls, but maybe the first step is maybe we start looking at indicator organisms whose mere presence is not going to trigger a recall. So, I think as we drift closer and closer to sharing data that could be used to justify a recall, or tie a company to an outbreak, that is definitely where people are more hesitant to move forward, especially with sort of the power of the genetic analysis and tying a pathogen from ten years ago to a factory to something that happened today. Are we going to be responsible for every case that was never truly tied to us? Yeah, that sort of uncertainty is what makes sharing the data a challenge."*
      11. *"The confidentiality of the data in terms of its source would be a concern, certainly. I think the extent to which that data may be used by regulatory bodies who may not have additional context surrounding the data may also be of concern."*
      12. *"When there's public health outbreaks and things like that, collating data related to that and sharing that, but that's less coming from the industry and more coming from the regulators. And I think that creates concern for industry because sometimes it's not always clear how that data, how the regulators then use that data, and how much is encouraging good industry practice and learning and exploring, how much is being used to prosecute, if you like. That's a very delicate balance. How do you hold people accountable? And you do. There are repercussions for breach, but also how we manage learning from those incidents in the right way to make change for good and for the whole industry. I think that is a very delicate balance."*
      13. *"I think guaranteed anonymity. Where you're not looking to identify any one company from the dataset, you're looking to learn from big data sets in a very clear purpose, that it’s about improvement and not about seeking out the bad actors to prosecute. I think having a very clear purpose, a very clear framework, and guardrails around the use of the data and its intent, and the right framework to protect all those who contribute their data from being individually singled out, would help."*
      14. *"But then, the other aspect then becomes if regulatory, like an FDA or a state regulatory, gets a hold of data. There's an aspect of these regulatory folks that do research and they help, but then there's other aspects where they have enforcement requirements. That's their specific job of this larger regulatory body. And so, it's hard to share data when a regulatory agency would then have to take action against you because you said, "here's what I found." Then people are protective of their data."*
      15. *"But again, a company's going to have fear, the repercussions of sharing that, so it's going to be a tough hurdle to get over, but there's a lot of good information that could be collected within a plant that's food safety data that if we were to look at it in aggregate, could it help things overall to say, here's the best intervention strategy for this organism? You probably could, but I think that's the hardest part of it."*
      16. *"I think probably in my view, the number one challenge is liability, legal liability, that companies and their lawyers are afraid that if somehow their product or their name got involved with something that was a regulatory issue, that that would open them up either to lawsuits or to regulatory actions. As a result, it goes backwards. And I think probably the best example of that is sharing of whole genome sequencing data where the companies absolutely do not want something pointing back to them."*
      17. *"But when you start saying, “can we enumerate Listeria in your finished product?”, game over. No conversation to be had. Your whole genome sequence that you're pulling from your plant? Nobody wants that data floating around. And it's a little bit because of regulatory, a lot of it is because of legal liability. And I know the regulators are like, well I don't know why [everybody doesn’t just] share their data is because they don't want to get sued out of business."*
      18. *"So, I think what has to be clear is, there has to be a clear, defined statement as to how regulatory authorities would use the data… They like to have the data, but then actually how it will be used for enforcement or issuing 483s or issuing warning letters, etc., is probably another thing. And this is sometimes the concern and also is how far back can they actually use the content of the information that is shared. So, it has to be clearly defined of how, you know, what are the rules of the game, as it were, with respect to what the regulator will or can do."*
      19. *"So, once this information becomes public, if FDA finds that, this company has a lot of positives, you know, they know that, we got to go and make a visit to this company because there is an issue going on.”*
      20. *"So, I think that that's more the hurdle is finding the ideal company to say they do this, and be proud of it and get through all the legal guidelines. So, usually if somebody leads, others will follow. But it can be very scary. And I think that right now is where we're at because there are a lot of legal ramifications. If all this information is shared freely, or it gets included in something like a QR code, you're immediately going to start impacting people. A similar topic was brought up a couple of years ago, I think at a produce association meeting about can't we just have the recall information tied into something like a barcode? You could, but then nobody would buy from the leafy green companies because the outbreaks are ridiculous. But we all like to eat salad. So, it's very much that consumer perception to, the consumer doesn't really understand the food safety data. You hear something like pathogen or Listeria or even E. coli, and there's not an understanding of risk."*
      21. *" Regulatory risk, I guess really is the other big concern, so there's the concern that if I swabbed for Listeria species or Listeria monocytogenes and I get a positive finding on a food contact surface, does that mean, all of my product implicated? Do I have a recall on my hands because I have this positive finding ... There's a lot of people who think that, whether it's Listeria monocytogenes or Listeria species, the regulatory risk is the same. And so, because of that fear, I think that's where that's maybe putting up a barrier to just sharing your data because you don't want to open up your operation to more intensified scrutiny."*
      22. *"So, I think there's just the data security and knowing how is your data actually secured and not open to being hacked or anything of that nature? How do you know it's actually safe? And then there's the privacy and security side from the FDA, you know, if you're collecting this data and housing it somewhere, what legally does the FDA have access to, if any? And so, I think, having better clarity on that and maybe having more collaborative conversations with FDA on how they would use that data and what regulatory risk might exist."*
      23. *"With the whole, whole genome sequencing and all the different typing and things that Industry can do with some of their environmental situations like, I think that's something that we're all still very sensitive to. We want the information to help us make our programs better and help us protect the safety of the food. However, we know that that information also holds you accountable from the molecular level. If certain, if certain, if that's shared out too far, too broad, I guess so. Still, I think we're all very sensitive about how much and how deep we want to share that information."*
      24. *"Yeah, tremendous benefits. I think we would be further ahead as an industry in general in food if we were comfortable sharing, knowing that there wasn’t a potential risk. And I think the biggest risk that people in my role see is where's it going to end up? Is it going to go to a regulatory commission that may interpret it in a different way or use it in some way that we that we that we can’t foresee would put our business or our customers at risk?"*
      25. *"I think a couple of a couple of them are going to be tough without getting the right people in front of the right regulators and having regulators provide some confidence that, hey, we are not going to come down hard on people who are trying to do the right thing and find the environmental problems. I think that's one of the bigger concerns is, well, they're going to take my data and they're ultimately going to use it to try to link to illnesses that happened maybe a decade ago because they've got this big library. So, having the right conversation, the right people in the industry and regulatory together to say we want to do the right thing, or we want to be sure that we're not all going to be immediately penalized as a result, finding a way to do that would be a huge step. And I'm not sure who is willing to have that conversation just yet."*
   4. **While participants expressed that technology could play a major role in facilitating data sharing, others expressed concerns about the security, privacy, and confidentiality aspects of using technology for data sharing, and also expressed a lack of confidence in existing technologies that could ensure privacy**
      1. *"The efforts I have seen have not convinced me that the security is adequate, that in the event of an outbreak or a non-negative test result, that our information would remain as part of an aggregated or an aggregated result. Our specific information could be made known to people without our desired intent."*
      2. *"So, if you, if we want to create a bit of a level playing field and encourage industry partners to engage, we will have to provide privacy protection for individual companies. And build trust, I think, in what the intent is and what it isn’t is equally as important, if not more important, around how the data is going to be used and how we can anonymize them and protect people's privacy."*
      3. *"Well, I can tell you right now, artificial intelligence is not ready to be utilized, I don't think, in this area just because of some of the bias that is being demonstrated already. But I think again, it's trust. It's anonymity. I think it'll take a little while to build up that trust. Once an example is shared, or there's robust guidelines up front. Because as you and I know, even if I send an email from my IP address, people can find out where that came from. So, there has to be some very strict guidelines in force and some robust confidentiality agreements, or it has to start in the beginning to carry through to whoever or whatever this clearinghouse is. And I'm not a technology guy."*
      4. *"I would consider it, but again, why am I going to like, what am I going to get out of it right? What am I getting out using it? But yeah, I would potentially consider it. But I will tell you that the whole cybersecurity situation has really put a, a whole new set of requirements that were required to, you know, jump through hoops to meet for any technology we bring in."*
      5. *"I think it could play a major role in finding solutions to some of these challenges. Again, if it's used properly you know, AI is a pretty hot term and topic right now. And I think there's a lot of potential for the food industry to take advantage of that technology to help not only as a whole, but when you talk about food safety and food quality, I think there's some opportunities there. But it's not something that we probably know the full potential of right now. It may take several years in order to figure out how to use it for the right reasons."*
      6. *"So, if there is a technology out there that could assure us that either in the event of foodborne illness outbreak and regulators contacted this data sharing collecting entity, knowing that they have these thousands of data points from individual participants. And if they subpoenaed the information, could that entity prevent the disclosure of our individual information? Or if plaintiffs’ counsel in a lawsuit, even if it's not involving us, but if they're suing someone else, someone else whose data may be in this same repository, could counsel get access to that information? Could my customers go to these entities and request and actually receive? If there were technological lockdowns that gave sufficient confidence that those concerns would not happen, we would be more inclined to participate in a data sharing event. But in reality, if our company is involved in a lawsuit, that information is going to be discoverable. But I can control how that information is released to plaintiff's counsel. I can control what is released. But so having that control is important to us. It's our data. We own it."*
      7. *"So, if we want to create a bit of a level playing field and encourage industry partners to engage, we will have to provide privacy protection for individual companies. And build trust, I think, in what the intent is and what it isn’t is equally as important, if not more important, around how the data is going to be used and how we can anonymize them and protect people's privacy."*
   5. **There is a concern that shared data could be misinterpreted or used out of context, potentially leading to inaccurate conclusions or unintended consequences**
      1. *"Categorize the information or make sure it's segmented so it's applicable to the correct people and it's not misinterpreted. I think that's critical. And I also think anonymity is also critical if there is data sharing, not only the specific industry that [name] talked about, but also making sure that that information is handled confidentially."*
      2. *"Well the first thing that comes to mind of why we wouldn't share is just so that I guess if any data was out of the specification or the normal range, what kind of impact would that have on our sales, on our reputation, on the ability to grow. And oftentimes any data or information can be misinterpreted or taken out of context where even though a corrective action was in place and worked correctly, if all the information is shared, then the appearance of what the data may be representing could be wrong and detrimental to a company. So, I think it just has to make sure that if you’re going to share data that every party involved understands what the data means and what has been done with it, if it is out of a specification or a range or whatever the parameters are there."*
      3. *"We discussed the core issue with the data sharing, which is, privacy, and I think that should be, that should be the takeaway from this discussion that. We don't want to share all our information because there is a risk of that becoming public. With Twitter and all these social platforms that we have now, information gets misconstrued by people who don't understand the information."*
      4. *"One of the risks and concerns that I know some industry members have is, unless you work in the food industry and you have experience in the food industry, it's sometimes difficult to interpret information that comes out from what occurs in the food industry. And that's part of the hesitation for some organizations that they don't want it to be on The Washington Post headline tomorrow, whatever the situation is, because it can be taken out of context, misinterpreted and then a news story comes out that is a challenge that the industry faces, is that sometimes with the regulators, they don't have folks who understand, I'll say French fry processing or chocolate making or confectioner or dairy or whatever it is."*
      5. *"The only, so the biggest concern, right, would be from data that was shared and then is misinterpreted or misused, and or is used to for litigious purposes, you know, whether the company gets sued later and or there's a regulatory action because the data is, the data may be misinterpreted or used to trace back after the fact to an issue that occurred."*
      6. *"I think there's a lot of components to go with it to make sure that what you're sharing is accurate and truthful. And you also have to look at it in the context of, the context of risk. Understanding what that data truly means in relationship to whatever you are saying it represents. So, in that case, in that case, I think the knowledge of, what the knowledge of, what the data says to you, what it means, and the interpretation is just important."*
      7. *"Well obviously any data sharing will have to be approved by our legal department. And I'm pretty sure every company will tell you the same thing. I think it's a different story if we're talking about sharing that data with a government agency because like I said, even if it's among the industry members, we can collaborate and sit down and analyze the data ourselves, looking at it with them. Say you partner with another company and then you start looking at your food safety data together,* *I think there's no problem with that. The issue with the government is the government has to do their own analysis; you cannot be part of it. And so, by not being part of it, you don't have a say. "*
4. **The need exists for sustained collaboration between academia, government, and industry to identify trade-offs in data sharing, establish data governance, and enable improved food safety through information pooling**
   1. **Some participants expressed interest in having a third-party entity, such as academic institutions, act as the data governing body to facilitate data sharing and spearhead the use of privacy-preserving technologies**
      1. *"There's probably something we can do to build some confidence in, like, I think there's some governance that could be applied to data sharing that would generate some comfort on those that are a little bit paranoid about, like, what they're sharing or where it's going. I think there's some governance we could apply to this idea that could be generated by, like, a third independent party, a neutral party that really does not win or lose or gain in any of this. They're just governing for us."*
      2. *"And yeah, so, and we shouldn't be sharing data just to share data. If we're sharing data to solve a problem, that is the right context. But then again, it also needs to be protected and because sharing data, sharing again in today's environment, just sharing to share is, there's being transparent and then there's being like naked walking down the street."*
      3. *"I think this is something where I think the industry could be, it would be helpful to have some leadership and not just the industry, because I think that academic institutions could play a real role in this too, to serve as the honest broker in between the regulatory agencies and the industry, to put together a system that would accomplish the sort of things you've been asking about. And again, this is, it would not be overnight. But I think having a much tighter agreement between all three areas, that is industry, academia and government is going to have to, it's going to have to happen. And it's going to start with trust between all three of them."*
      4. *"I think one of the challenges has been somewhat addressed in certain regions, and that's working with third-party like a research institution, who has the ability to maintain the data without completely sharing it… Industry goes to them because they know they can do the studies, and they feel comfortable sharing information that otherwise probably wouldn't get out to their customer. So, there's a hurdle that one of the solutions would be creating a similar institute or creating a network of those institutes where they could talk to each other and share some information with an unbiased third party perspective in the sense of no names are on there, the data is randomized, it's shared, and it results in the publication of a paper, or a white paper or a calculator or whatever it may be. Then I think there's a way to get around some of the issues, business to business? I think where that's going to become difficult, is the legal requirements. That's probably the biggest hurdle."*
      5. *"So, there are definitely some challenges, but if you have one good, solid leader and you work with third-party institutions to try and keep the company protected as much as possible, I think that's where they're more open to sharing."*
      6. *"Any data that we have ever shared with any of our competitors, either directly within our space or indirectly within the food manufacturing space, has always been done through blinding, through a third-party legal team, etc..."*
      7. *"Having that third-party industry association, if you will be the collaborator, be the person or the association that brings people to the table and supports those conversations, it becomes much easier to openly discuss, especially in person, openly discuss what I'm doing, what you're doing without what the other company over there is doing, and be willing to share documents, share policies, share programs that that can help others get better. It's all in the precompetitive realm, and it certainly does not cross any antitrust boundaries."*
      8. *"Universities could play a role. I think there's at least three legs to that stool if not four, where it's government, it's universities, it's industry associations and maybe individual companies themselves. "*
      9. *"But we’ve also developed relationships with third-party legal folks that have formerly worked for government. So, that's a nice partnership for us to kind of talk through these exact things about, like how much can we share? You know, what would you recommend for us to share so that we can, again, better ourselves and better our suppliers?"*
   2. **There is a need for data sharing interventions/initiatives to weigh the costs and benefits from the business or public health perspectives**
      1. *“If somebody can articulate the benefit to the person who's putting the data in, not a nebulous public health, “it's good for public health,” okay, but public health? I'm feeding people, that's public health, I'm doing lots of things that are public health. The downside of this public health contribution is, I could get sued for billions of dollars and put myself out of business. I'm not going to do it. There's no incentive right now…”*
      2. *“But right now, the risk of the information getting into the hands of unintended parties and the news against us outweighs the benefit that we can get from the macro trends and that is a pure risk management liability concern, it doesn't advance the altruistic interest of safety and raising the bar, it's about business survival and the protection of the enterprise, and not subjecting yourself to unnecessary risks that are beyond your ability to control.”*
      3. *"Well, I can give an example. I think it was Blue Bell ice cream, they ended up having to shut down the plant. There was a peanut butter company that ended up shutting down the facility. There was a baby formula just recently, last year and the year before last. There's real risk involved in many industries. And I think the impact people don't really appreciate, the impact that those issues can have on a company, not only the brand and the reputation, and just purely the impact on the supply chain for consumers."*
      4. *"I can't find a technology right now that talks to all my, all of my processes. So, I still have places where I have to have human intervention to make those bridges. And a lot of that has to do with the fact that the stuff that might be able to bridge them is so cost-prohibitive even for a company of the size that I work for, that it becomes like, I can't do it. I cannot justify it from a business perspective. From the whole science geeky, nerdy thing, yeah, that would be great. I cannot justify it from a business perspective to spend the money on that, you know. Money I'd spend on that, I'd rather spend on other things that actually make a day-to-day impact."*
      5. *"So, even setting up a relationship with a university to do testing. Could they be subjected for a data request? And so, I think that that's been brought to light recently in some of the industry sharing that various discussions about all the extra steps that your legal team may want to get involved with before you purely do a study for the benefit of science, it unfortunately just isn't always just there for the pure knowledge gain."*
      6. *"So, I automatically think there'll be data silos, that will always continue because of the prospect of litigation more than anything else. As much as that may sound bad, because again, it be thinking, “Hey, I just want to help public health”. You might not take that attitude, but I think that's something you have to weigh it aways very heavily when you're talking about company reputation and a business and things like that, because I don't think anybody just has a blatant disregard for public health. Somebody is out there that probably does, but I don't think that's most companies."*
      7. *"It’s just because of the commercial perspective in the business world. And so, I think it will be very rare to share those. I have seen information that's shared in public domain that that they're really good. You can see those in a food safety research perspective. And if the data can be less sensitive from a proprietary perspective, and those data is not being published, I think that's a good way to share that. But you just have to go through vigorous round of internal reviews to ensure that the impact to the business wise is very limited."*
      8. *"Being able to share and I think taking a third-party input usually takes out some of the fear. And that's why I traditionally have gone that route."*
      9. *"Obviously, we have to have a non-disclosure agreement in place because I think then some of the data maybe proprietary to our products, to our formulations. So, I think that's more for that. It's not about too much about the food safety and sharing, but it's just more so on to protecting the products and the companies as well as the formulations."*
   3. **Even though companies within the food industry do not share sensitive food safety information, such as environmental monitoring program test results, information on best practices and industry learnings is often shared through different means, such as industry-wide conferences and forums**
      1. *"Now what we do share is best practices, programs and processes. Maybe not the data itself. But what is your HACCP program for field workers for the field harvesting equipment or how you wash, process produce? So, we do share that, but the data itself, I would say it's pretty limited even with our peers, which is in some ways I understand, because there's ethical and legal reasons why that would be very limiting."*
      2. *"So, there's actually a decent amount of sharing within the food safety field. So, within industry to industry, it may be the finished product testing results. It could be environmental monitoring results. Results of audits experienced with known third-party groups, like laboratories. And so that data may be shared just in general as sort of a working group. And it could also be sort of customer client type relationship, sort of a supplier to a manufacturer ... And so, understanding peer responses is a common practice within the industry. And sometimes that's shared out and sometimes it is not shared."*
      3. *"I think it may be in routinely scheduled forums. So, there are some companies that that sort of run like a genomics forum within the industry that has industry partners just to keep everybody up to date in the in the latest information. So that can be guest speakers and it could be individual companies sharing success stories and even negative outcomes and just to help others learn."*
      4. *"There are sort of like the large industry conferences where some information may be shared. There are some industry only meetings that are between various industry groups and even utilizing sort of like your third-party nonprofit sites and so that sort of information is shared not for price fixing or competitive advantage, but really just to understand are we, is it something in our system, the way we have set up policies and the way we design tests is that creating this negative outcome that that we're seeing or are we seeing it just across the board? Other companies have that similar challenge."*
      5. *"So, information sharing is different [from data sharing] because in my mind, information sharing is like, I've already filtered through the data I've already accessed it, I see what it's telling me and I'm going to turn that into a report or I'm going to turn that into a dashboard, or I'm going to turn that into an email that I share with you. That's not data. That's information that's already been [filtered]. In my mind, that's how I differentiate between the two. The information sharing that's been going on across the industry for 100 years. The data sharing has not."*
      6. *"A lot of the times we have a lot of discussions between industry around methodologies. We have forums that you discuss your methodologies, the analytical methods, because quite often you there will be a method for detection of some pathogen and some person uses one method and somebody uses another one and there may be a discrepancy in the results. Then you have to understand why is there a discrepancy? The player says, I said it was below this level or I said it was absent. And you find positive or you find it above the level, then you have to harmonize the methodology."*
      7. *"Sometimes it will be industry forums such as IAFP, members of industry company will present and share best practice.”*
      8. *"If you're talking business to business, I think that I can say that with 100% certainty, some of that data does get shared between businesses for basic operational practices, but not more than would be considered necessary to keep the business moving forward."*
   4. **Collaboration fosters trust and establishes clear boundaries for the responsible use of shared data, ensuring long-term mutual benefits**
      1. *"I don't know what they can do, but promote the fact that we have an opportunity to improve public health, which is where their realm really kicks in. And from a public health standpoint, I think they have to be influencers to make people open and know that there's not going to be any retaliation, retribution, digging into data to try to pinpoint somebody. Then, I think there's an opportunity for them to have the ability to push things or to gather things in and make them better."*
      2. *"But it could be data, the ability to share data that is beneficial for, in my context, beneficial for public health, beneficial for like uncovering fraud, for example, and beneficial in terms of improving suppliers and supplier management. So, if we come together and say this is how we should set the rules, so we set specifications, then everybody raises the standard if everybody's going through the same level. So, this is some aspects we would do."*
      3. *"And there's just a lot of information that today is held very closely. And if we were more transparent and shared it more openly together, we could learn from each other."*
      4. *"I fundamentally believe that that* *[data sharing] can happen. You just need to put some more structure around it, such that people have more trust in it."*
      5. *"And maybe having more collaborative conversations with FDA on, you know, how would they use that data and what regulatory risk might exist. So, I know some of those conversations are being had with FDA within certain divisions, certain centers of FDA. More effort is needed to understand what the expectations of the federal agencies."*
   5. **Effective data sharing requires a clear understanding of the specific problem it aims to address and a well-defined purpose to ensure alignment with objectives**
      1. *"I think it would take significant work to ensure the confidentiality of the data and the security of the data so it couldn't be misappropriated. I think there would also be a need to work with regulatory authorities to align how the data would be used and what the expectations of the authorities would be relative to the data that they receive. I think these would be the primary concerns that need to be addressed in order for data to be shared more freely. Particularly because data without context is not necessarily so useful from, particularly from an enforcement perspective."*
      2. *"And there's just a lot of information that today is held very closely. And if we were more transparent and shared it more openly together, we could learn from each other."*
      3. *"I fundamentally believe that that can happen. You just need to put some more structure around it, such that people have more trust in it."*
   6. **Participants expressed they were unaware of the privacy-preserving technology**
      1. *“No, I don't have that knowledge [about privacy-preserving technologies]. That's too much technology for me.”*
      2. *“You know, even with AI. You know, I think that's still something that is internal. I don't know if I would use AI to be able to share. I mean, it's a predictive tool with the data set that we have.”*
      3. *“I'm not aware of any [privacy-preserving technologies] right now.”*
      4. *“No, I don't have that knowledge [about privacy-preserving technologies]. That's too much technology for me.”*
      5. *“I think as far as I understand, I don't understand the algorithms, but the way they are controlled is the users. So, we have specific users that can access the information or the level of information and that is how we control the privacy for this information.”*
