# Supplementary material for: Perceptions of Voluntary Horizontal Confidential Food Safety Data Sharing: An Exploratory Interview Study with Food Industry Leadership
Source: Research Square preprint supplement (doi:10.21203/rs.3.rs-6960610/v2), 2025-12-05
Supplement: Supplementary file 4 [file ce1d5f707119f292ba27b164.docx]

**Introduction**

Thank you for considering to participate in this interview. My name is Linda Kalunga and I am a new PhD student in the Food Science and Technology program at Cornell University. I was selected to conduct this interview because I do not have preconceived notions about the food industry that would bias the direction of the interview. We are interviewing you to better understand perceptions, attitudes, and practices about food safety data sharing within the food and agriculture industry. That said, we acknowledge the existence of data privacy concerns and would like to use this opportunity to also investigate obstacles to data sharing in the food industry and how they could be overcome.

The interview should take approximately 30 minutes, depending on how much information you would like to share. With your permission, I would like to record (audio for zoom dial-in, video for zoom video interviews) the interview because I don’t want to miss any of your comments. All responses will be kept confidential. This means that your de-identified interview responses will only be shared with research team members, and we will ensure that any information we include in our report does not identify you as the respondent. **You may decline to answer any question or stop the interview at any time and for any reason**. Are there any questions about what I have just explained? I will now obtain your verbal consent:

1. Do you consent to take part in the study?

Yes  No

1. Do you consent to this interview being audio recorded?

Yes  No

1. Do you consent to this interview being video recorded?

Yes  No

**INTERVIEW QUESTIONS**

1. **Introductory questions**
   1. To provide some context, can you tell me a little bit about the type of company you are representing, what you do, and how long you have been in a leadership role?
   2. What do you understand the term “industry-to-industry data sharing” to mean?

**I’d like to discuss three main situations in the industry during the interview:**

- Food safety data collection and sharing practices.
- Food safety data collected but ***not*** shared.
- Food safety data ***not*** even collected for various concerns.

***I am not asking for any proprietary information.***

1. **Food safety data collection and sharing (industry to industry) practices.**

Can you share a few examples of food safety data collection and sharing practices within the industry in general that you are familiar with?

- Are these data typically digitalized or not (why)?
- Data shared?
  - How shared?
  - Benefits of sharing?
- Challenges/concerns
  - Data privacy and confidentiality
  - Legal or regulatory

1. **Food safety data collected but not shared.**

Now, I’d like to talk about the types of food safety data that are collected within your industry but are ***rarely or never*** shared. Can you think of a few examples?

- Benefits, if shared?
- Why this data is ***not*** shared?
  - Liability
  - Legal and regulatory
  - Technology?
- Solutions
- Food safety insurance stipulations

1. **Food safety data not collected for various concerns.**

Can you talk about the types of data that would be accessible for collection and beneficial to companies in your industry if shared but are ***not*** collected for various reasons, including potential privacy or liability concerns?

- Benefits, if collected and shared?
- Solutions
  - Legal or regulatory changes necessary?

1. **Data sharing technologies**

I’d now like to talk about what role you think technology should play in addressing some of the challenges discussed earlier.

- Are you familiar with any technologies for data sharing?
  - Privacy preserving algorithms (e.g., differential privacy)
  - Algorithms that provide benchmarks
  - Reasons for using (or not) available technologies?

1. **Concluding question**

Any other thoughts you’d like to share?

**Last consent question:**

1. Do you consent to be contacted in the future with a summary of results from this project?

Yes  No

1. Do you consent to be contacted in the future about different research projects on food safety data sharing?

Yes  No
